# Supplementary material for: Initial Cell Seeding Density Influences Pancreatic Endocrine Development During in vitro Differentiation of Human Embryonic Stem Cells
Source: PubMed Central journal article supplement (PMC3852888; doi:10.1371/journal.pone.0082076), 2013-12-04
Supplement: pone.0082076.s005.pdf [file pone.0082076.s005.pdf]

**Table S1 - RT-qPCR primers**

| Gene Name    | Gene Accession | Product Size (bp) | Primer Sequence<br>Forward / Reverse 5'→3'              | Ref. |
|--------------|----------------|-------------------|---------------------------------------------------------|------|
| OCT4         | NM_002701.4    | 78                | TGGGCTCGAGAAGGATGTG<br>GCATAGTCGCTGCTTGATCG             | [1]  |
| FOXA2        | NM_021784.4    | 89                | GGGAGCGGTGAAGATGGA<br>TCATGTTGCTCACGGAGGAGTA            | [1]  |
| Goosecoid    | NM_173849.2    | 70                | GAGGAGAAAGTGGAGGTCTGGTT<br>CTCTGATGAGGACCGCTTCTG        | [1]  |
| PDX1         | NM_000209      | 178               | CGTCCAGCTGCCTTTCCCAT<br>CCGTGAGATGTAAGTGTGAATAGGA       | [2]  |
| MNX1         | NM_005515.3    | 115               | TCGCTCATGCTCACCGAGA<br>CCTTCTGTTTCTCCGCTTCCT            |      |
| PTF1a        | NM_178161      | 180               | GCAGCCAGGCCAAGAAGGTC<br>TTCTGGGGTCTCTGGGGTCCA           |      |
| NKX6.1       | NM_006168      | 186               | GCCCGCCTGGAGGGACGCA<br>ACGAATAGGCCAAACGAGCCC            | [2]  |
| NGN3         | NM_020999      | 286               | AGACGACGCGAAGCTCACC<br>AAGCCAGACTGCCTGGGCT              |      |
| ARX          | NM_139058.2    | 141               | CTGCTGAAACGCAAACAGAGGC<br>CTCGGTCAAGTCCAGCCTCATG        |      |
| PAX4         | NM_006193      | 169               | AGCAGAGGCACTGGAGAAAGAGTT<br>CAGCTGCATTTCCCACTTGAGCTT    | [2]  |
| MAFA         | NM_201589      | 195               | CTTCAGCAAGGAGGAGGTCA<br>TTGTACAGGTCCCCTCTTT             |      |
| Insulin      | NM_000207.2    | 245               | AGCCTTTGTGAACCAACACC<br>GCTGGTAGAGGGAGCAGATG            | [2]  |
| Glucagon     | NM_002054.4    | 275               | CATTCACAGGGCACATTCAC<br>CGGCCAAGTCTTCAACAAT             | [2]  |
| Somatostatin | NM_001048.3    | 126               | AGCTGCTGTCTGAACCCAAC<br>CCATAGCCGGGTTTGAGTTA            | [2]  |
| NeuroD1      | NM_002500.2    | 146               | GCCCCAGGGTTATGAGACTAT<br>GAGAACTGAGACACTCGTCTGT         |      |
| BRN4         | NM_000307.3    | 150               | CTGCAACTGGGTGCGATCAT<br>AGGCTGCGAGTACACGTTGA            |      |
| NKX2.2       | NM_002509      | 221               | CCTTCTACGACAGCAGCGACAACCCG<br>CCTTGGAGAAAAGCACTCGCCGCTT | [2]  |
| Albumin      | NM_000477.5    | 216               | CCTTGGTGTGATTGCCTT<br>TTGCACAGCAGTCAGCCAT               | [3]  |
| NKX2.1       | NM_001079668.2 | 164               | GTACCAGGACACCATGAGGAAC<br>CCATGTTCTTGCTCACGTCCC         | [4]  |
| Amylase      | NM_000699.2    | 141               | AATGTCAAGCTACCGTTGGCC<br>TTCACAGACCCAGTCATTGCC          | [3]  |
| HPRT         | NM_000194.2    | 148               | TGTTGTAGGATATGCCCTTGACTAT<br>GCGATGTCAATAGGACTCCAGA     |      |

**References**

1. D'Amour KA, Agulnick AD, Eliazar S, Kelly OG, Kroon E, et al. (2005) Efficient differentiation of human embryonic stem cells to definitive endoderm. *Nat Biotechnol* 23: 1534-1541.
2. Gage BK, Riedel MJ, Karanu F, Reznia A, Fujita Y, et al. (2010) Cellular reprogramming of human amniotic fluid cells to express insulin. *Differentiation* 80: 130-139.
3. Mfopou JK, Chen B, Mateizel I, Sermon K, Bouwens L (2010) Noggin, retinoids, and fibroblast growth factor regulate hepatic or pancreatic fate of human embryonic stem cells. *Gastroenterology* 138: 2233-2245, 2245 e2231-2214.
4. Mou H, Zhao R, Sherwood R, Ahfeldt T, Lapey A, et al. (2012) Generation of multipotent lung and airway progenitors from mouse ESCs and patient-specific cystic fibrosis iPSCs. *Cell Stem Cell* 10: 385-397.
